# Supplementary material
Source: bioRxiv or medRxiv preprint supplement (https://www.biorxiv.org/content/biorxiv/early/2020/04/18/2020.04.17.046441/DC1/embed/media-1.pdf)
Supplement: Supplementary file [file media-1.pdf]

# SUPPLEMENTARY DATA

## **Human-lineage-specific genomic elements: relevance to neurodegenerative disease and *APOE* transcript usage**

Zhongbo Chen<sup>1</sup>, David Zhang<sup>1</sup>, Regina H. Reynolds<sup>1</sup>, Emil K. Gustavsson<sup>1</sup>, Sonia García Ruiz<sup>1</sup>, Karishma D'Sa<sup>1</sup>, Aine Fairbrother-Browne<sup>1</sup>, Jana Vandrovcova<sup>1</sup>, International Parkinson's Disease Genomics Consortium (IPDGC)<sup>#</sup>, John Hardy<sup>1,2,3,4,5</sup>, Henry Houlden<sup>6</sup>, Sarah A. Gagliano Taliun<sup>7</sup>, Juan Botía<sup>8</sup>, Mina Ryten<sup>1</sup>

<sup>1.</sup> *Department of Neurodegenerative Disease, Queen Square Institute of Neurology, University College London (UCL), London, UK*

<sup>2.</sup> *Reta Lila Weston Institute, Queen Square Institute of Neurology, UCL, London, UK*

<sup>3.</sup> *UK Dementia Research Institute at UCL, Queen Square Institute of Neurology, UCL, London, UK*

<sup>4.</sup> *NIHR University College London Hospitals Biomedical Research Centre, London, UK*

<sup>5.</sup> *Institute for Advanced Study, The Hong Kong University of Science and Technology, Hong Kong SAR, China*

<sup>6.</sup> *Department of Neuromuscular Disease, Queen Square Institute of Neurology, UCL, London, UK*

<sup>7.</sup> *Center for Statistical Genetics and Department of Biostatistics, University of Michigan, Ann Arbor, Michigan, USA*

<sup>8.</sup> *Departamento de Ingeniería de la Información y las Comunicaciones, Universidad de Murcia, Murcia, Spain*

<sup>#</sup> *Full list of consortium members appended*

Correspondence to Dr Mina Ryten (mina.ryten@ucl.ac.uk)

## **SUPPLEMENTAL DATA**

### **Supplementary Data Figure Titles and Legends**

**Supplementary Figure 1. Kernel density plots of annotation metrics.** Panel **a** depicts density plot of constraint (context dependent tolerance score (CDTS): a lower CDTS represents more constrained data). Panel **b** shows the density distribution of the mean phastCons20 scores per 10bp bin. Panel **c** shows the distribution of log2 ratio (CNC score), of the reverse ranked CDTS (so a higher rank pertains to higher constraint but lower CDTS) and ranked phastCons20 scores, partitioned by regions of exon, intron and intergenic as defined by Ensembl v.92.

**Supplementary Figure 2. Proportion of enriched neurologically-related GO terms in the gene set analysis compared between the annotation of interest (CNCRs) and the comparator annotation sets (a). Proportion of neurologically-related GO terms at CNCR density of 0.3 and above (b).**

**Supplementary Figure 3. Sanger sequencing of human hippocampus cDNA using targeted primers within *APOE*, aligned to hg38.** Primers as listed in Supplementary Table 3.

## Supplementary Tables

**Supplementary Table 1. Annotation priority order for genomic feature.** Genomic features are based on both Gencode and Ensembl. A priority order for annotation with a genomic feature is assigned to avoid conflict with overlapping features. The number of 10bp bins across the genome is also shown in the table.

**Supplementary Table 2. Genome-wide association studies used in the stratified LDSC analysis.** The GWAS for Parkinson's disease and major depressive disorder do not incorporate 23&Me data.

**Supplementary Table 3. Primer positions and sequences used to validate the *APOE* intron-3 retention event.**

**Supplementary Table 4. Results for heritability, enrichment, and regression coefficient from stratified LDSC analysis.** The coefficient p-values are one-sided p-values calculated from the coefficient Z-score.

**Supplementary Table 5. Significantly enriched nervous system-related GO terms for CNCRs at density of 0.3.** P-value relates to the p-value for enrichment calculated using g:Profiler and its own g:SCS correction method<sup>28</sup>.

# SUPPLEMENTAL DATA

## Supplementary Figures

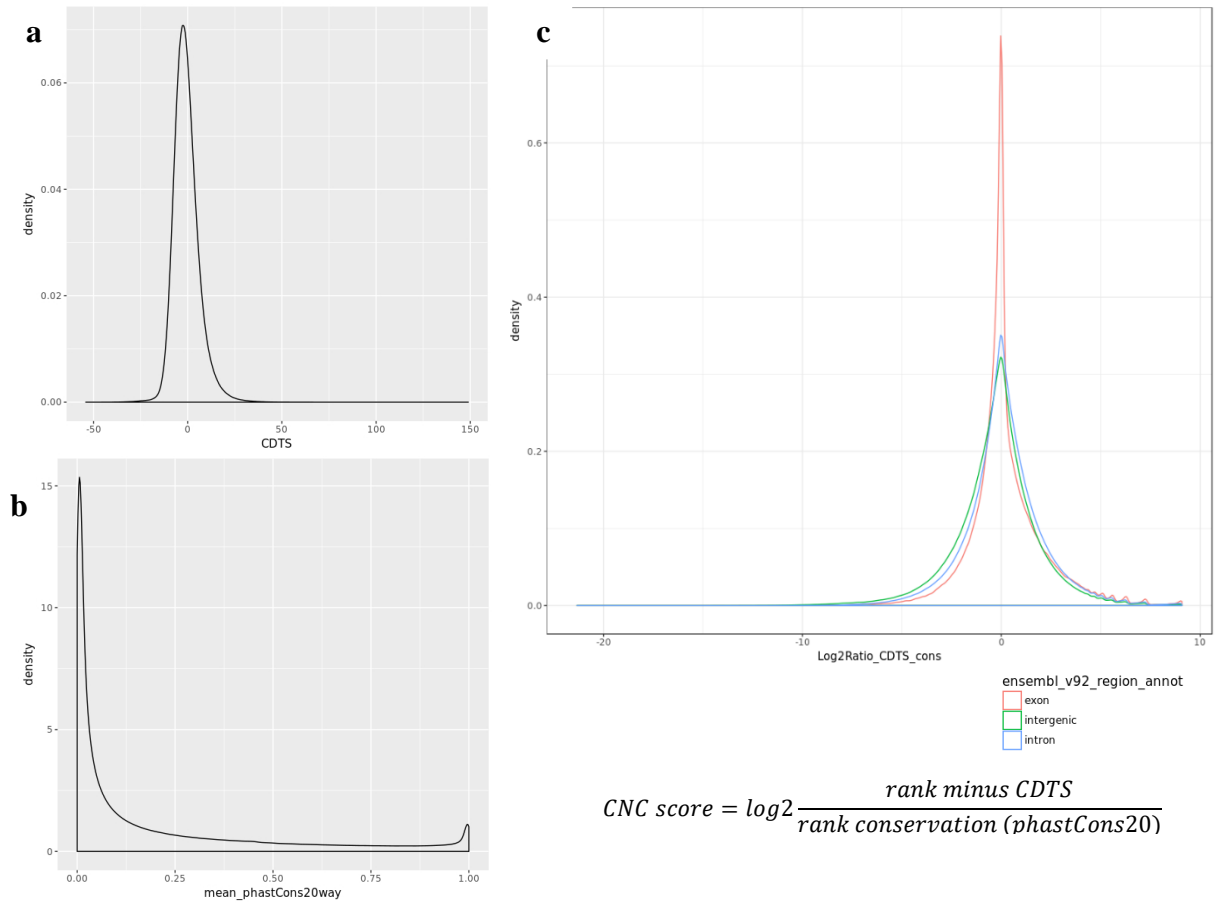

**Supplementary Figure 1. Kernel density plots of annotation metrics.**

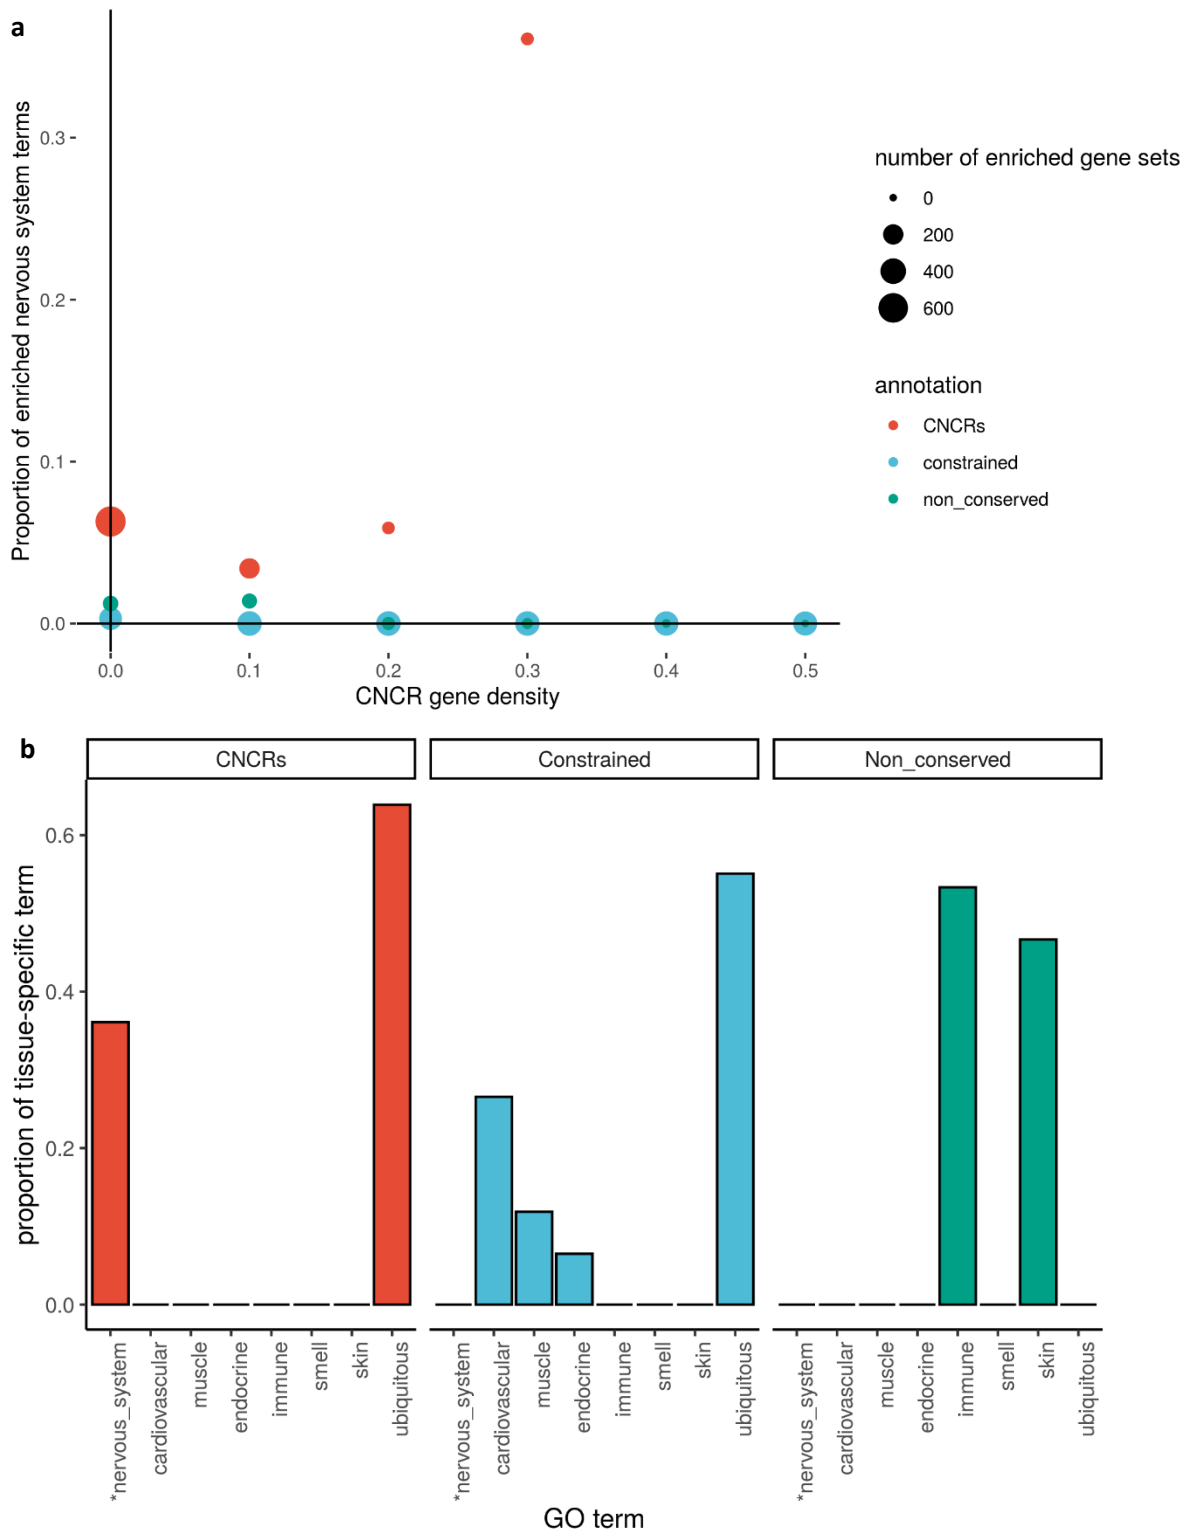

**Supplementary Figure 2. Proportion of enriched neurologically-related GO terms in the gene set analysis compared between the annotation of interest (CNCRs) and the comparator annotation sets (a). Proportion of neurologically-related GO terms at CNCR density of 0.3 and above (b).**

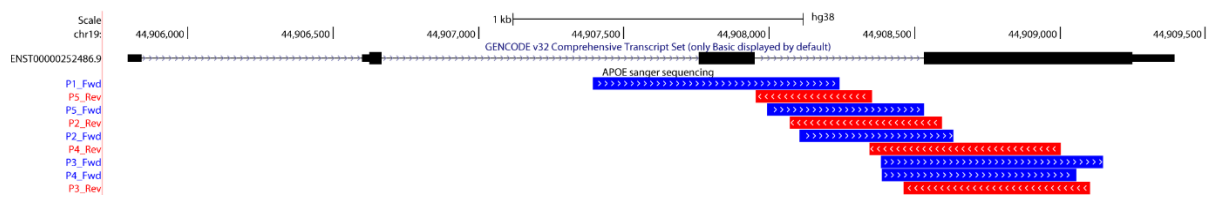

**Supplementary Figure 3. Sanger sequencing of human hippocampus cDNA using targeted primers within *APOE*, aligned to hg38.**

## Supplementary Tables

| <b>Annotation<br/>priority order</b> | <b>Genomic feature</b> | <b>Number of<br/>10bp bins</b> | <b>Description</b>                                       |
|--------------------------------------|------------------------|--------------------------------|----------------------------------------------------------|
| 1                                    | Exon PCCDS             | 1,453,269                      | Exon, protein-coding sequence                            |
| 2                                    | Exon NCRNA             | 1,156,726                      | Exon, non-coding RNA, e.g. lincRNA                       |
| 3                                    | Exon PCUTR             | 892,210                        | Exon, protein-coding UTR                                 |
| 4                                    | Promoter               | 820,321                        | Promoter                                                 |
| 5                                    | Promoter Flanking      | 1,074,641                      | Cluster with promoters or distal cis-regulatory elements |
| 6                                    | Enhancer               | 251,636                        | Enhancer                                                 |
| 7                                    | Intron, cis            | 108,670                        | Introns located in genes <10bp from splice-site          |
| 8                                    | Intron, trans          | 15,204,447                     | Introns located in genes >10bp from splice-site          |
| 9                                    | Intergenic             | 689,419                        | Not annotated in GenCode/ Ensembl                        |
| 10                                   | H3K9me3                | 2,082,553                      | Only overlap with H3K9me3                                |
| 11                                   | H3K27me3               | 777,409                        | Only overlap with H3K27me3                               |
| 12                                   | Multiple histones      | 5,199,455                      | Overlap with a combination of histone marks              |
| 13                                   | Other                  | 1,404,860                      | Includes open chromatin and unannotated features         |

**Supplementary Table 1. Annotation priority order for genomic feature.**

| <b>Disease</b>                  | <b>Author, Year, Reference</b>                   | <b>n case</b> |
|---------------------------------|--------------------------------------------------|---------------|
| Intelligence                    | Savage, 2018 <sup>23</sup>                       | 269,858       |
| Alzheimer's disease (AD)        | Jansen, 2018 <sup>24</sup>                       | 71,880        |
| Parkinson's disease (PD)        | Nalls, 2019 (excluding 23&Me data) <sup>25</sup> | 33,674        |
| Major depressive disorder (MDD) | Wray, 2018 (excluding 23&Me data) <sup>27</sup>  | 59,851        |
| Schizophrenia (SCZ)             | Pardiñas, 2018 <sup>26</sup>                     | 40,675        |

**Supplementary Table 2. Genome-wide association studies used in the stratified LDSC analysis.**



| <b>Primer name</b> | <b>5' – 3' sequence</b> | <b>Strand</b> | <b>Chr: Start-End (hg38)</b> |
|--------------------|-------------------------|---------------|------------------------------|
| <b>P1_Fwd</b>      | ACAAGGACACTCAATACATGC   | +             | 19:44907289-44907309         |
| <b>P1_Rev</b>      | CAGAGACGAAGAAGGAGCTAG   | -             | 19:44908338-44908358         |
| <b>P2_Fwd</b>      | GGTTCTAGCTTCCTCTTCCC    | +             | 19:44908064-44908083         |
| <b>P2_Rev</b>      | CGCCTGCAGCTCCTTGGACAG   | -             | 19:44908627-44908647         |
| <b>P3_Fwd</b>      | CCTAGCTCCTTCTTCGTCTC    | +             | 19:44908337-44908356         |
| <b>P3_Rev</b>      | CTCGAACCAGCTCTTGAGG     | -             | 19:44909130-44909148         |
| <b>P4_Fwd</b>      | CCTTCTTCGTCTCTGCCTC     | +             | 19:44908344-44908362         |
| <b>P4_Rev</b>      | CTGCTCCTTCACCTCGTC      | -             | 19:44909037-44909055         |
| <b>P5_Fwd</b>      | GTGAGTGTCCCCATCCTGG     | +             | 19:44907953-4490771          |
| <b>P5_Rev</b>      | CTGCGGCCGAGAGGGCGGGAG   | -             | 19:44908512-44908532         |

**Supplementary Table 3. Primer positions and sequences used to validate the *APOE* intron-3 retention event.**

| <b>Annotation</b>    | <b>GWAS</b>                    | <b>Proportion SNPs</b> | <b>Proportion heritability</b> | <b>Enrichment</b> | <b>Enrichment p-value</b> | <b>Regression Coefficient</b> | <b>Coefficient Z-score</b> | <b>Z- score -log P-value</b> |
|----------------------|--------------------------------|------------------------|--------------------------------|-------------------|---------------------------|-------------------------------|----------------------------|------------------------------|
| <b>CNCR</b>          | <b>Intelligence 2018</b>       | 0.03071                | 0.33916                        | 11.04414          | 5.12E-20                  | 2.96E-07                      | 10.05909                   | 23.37797                     |
| <b>Constrained</b>   |                                | 0.0547                 | 0.441239                       | 8.06649           | 3.20E-21                  | 1.85E-07                      | 9.413106                   | 20.61827                     |
| <b>Non-conserved</b> |                                | 0.12551                | 0.329821                       | 2.627846          | 1.32E-05                  | 6.28E-08                      | 5.125337                   | 6.828264                     |
| <b>CNCR</b>          | <b>AD 2019</b>                 | 0.03071                | 0.398428                       | 12.9741           | 0.009868                  | 1.89E-08                      | 1.960767                   | 1.602875                     |
| <b>Constrained</b>   |                                | 0.0547                 | 0.532373                       | 9.732543          | 0.001961                  | 1.12E-08                      | 1.964995                   | 1.607173                     |
| <b>Non-conserved</b> |                                | 0.12551                | -0.34052                       | -2.71312          | 0.216138                  | -8.51E-09                     | -1.58533                   | 0.025233                     |
| <b>CNCR</b>          | <b>PD 2019 (ex.23&amp;Me)</b>  | 0.03071                | 0.334257                       | 10.88446          | 0.001934                  | 2.57E-08                      | 2.76684                    | 2.548194                     |
| <b>Constrained</b>   |                                | 0.0547                 | 0.367301                       | 6.714792          | 0.008806                  | 1.32E-08                      | 2.080212                   | 1.726928                     |
| <b>Non-conserved</b> |                                | 0.12551                | 0.149455                       | 1.190777          | 0.856765                  | 1.28E-10                      | 0.036813                   | 0.313975                     |
| <b>CNCR</b>          | <b>MDD 2018 (ex.23&amp;Me)</b> | 0.03071                | 0.330293                       | 10.7554           | 1.39E-07                  | 1.13E-07                      | 5.421715                   | 7.529959                     |
| <b>Constrained</b>   |                                | 0.0547                 | 0.403657                       | 7.379441          | 1.51E-08                  | 6.29E-08                      | 4.940762                   | 6.409951                     |
| <b>Non-conserved</b> |                                | 0.12551                | 0.432541                       | 3.446263          | 5.02E-04                  | 3.84E-08                      | 3.908254                   | 4.332707                     |
| <b>CNCR</b>          | <b>SCZ 2018</b>                | 0.03071                | 0.33881                        | 11.03275          | 2.50E-16                  | 6.53E-07                      | 8.829352                   | 18.27867                     |
| <b>Constrained</b>   |                                | 0.0547                 | 0.425132                       | 7.772029          | 2.19E-17                  | 4.04E-07                      | 8.456392                   | 16.86047                     |
| <b>Non-conserved</b> |                                | 0.12551                | 0.308866                       | 2.460883          | 8.75E-04                  | 1.18E-07                      | 3.576297                   | 3.758833                     |

**Supplementary Table 4. Results for heritability enrichment, and regression coefficient from stratified LDSC analysis.**

| <b>GO ID</b> | <b>GO term description</b>                       | <b>P-value</b> |
|--------------|--------------------------------------------------|----------------|
| GO:0048663   | neuron fate commitment                           | 5.46E-07       |
| GO:0048665   | neuron fate specification                        | 0.0012         |
| GO:0021510   | spinal cord development                          | 0.00129        |
| GO:0021517   | ventral spinal cord development                  | 0.00175        |
| GO:0021515   | cell differentiation in spinal cord              | 3.64E-07       |
| GO:0021953   | central nervous system neuron differentiation    | 7.44E-05       |
| GO:0021522   | spinal cord motor neuron differentiation         | 3.48E-04       |
| GO:0021520   | spinal cord motor neuron cell fate specification | 0.0479         |
| GO:0021527   | spinal cord association neuron differentiation   | 0.00533        |
| GO:0021871   | forebrain regionalization                        | 7.91E-05       |
| GO:0021978   | telencephalon regionalization                    | 0.00313        |
| GO:0030902   | hindbrain development                            | 0.0337         |
| GO:0021536   | diencephalon development                         | 0.045          |

**Supplementary Table 5. Significantly enriched nervous system-related GO terms for CNCRs at density of 0.3.** P-value relates to the p-value for enrichment calculated using g:Profiler and its own g:SCS correction method<sup>28</sup>.
